# Supplementary material for: The return to work experiences of middle-aged Australian workers diagnosed with colorectal cancer: a matched cohort study
Source: PubMed Central journal article supplement (PMC4190428; doi:10.1186/1471-2458-14-963), 2014-09-17
Supplement: 12889_2014_7098_MOESM1_ESM.pdf [file 12889_2014_7098_MOESM1_ESM.pdf]

Additional file 1

Table 1. Descriptive analyses between the participants and non-participants (colorectal cancer group)

| Variables          |                         |              | Participated in WACS |              |                 | p-value            |
|--------------------|-------------------------|--------------|----------------------|--------------|-----------------|--------------------|
|                    |                         |              | no<br>n=859          | yes<br>n=239 | total<br>n=1098 |                    |
| Status             | eligible and consented  | n            | 0                    | 239          | 239             |                    |
|                    |                         | %            | 0.0                  | 21.8         | 21.8            |                    |
|                    | no consent (by patient) | n            | 466                  | 0            | 466             |                    |
|                    |                         | %            | 42.4                 | 0.0          | 42.4            | -                  |
|                    | no consent (by doctor)  | n            | 393                  | 0            | 393             |                    |
|                    | %                       | 35.8         | 0.0                  | 35.8         |                 |                    |
|                    | missing                 | n            | 0                    | 0            | 0               | -                  |
| Age                | years in 2010           | median (IQR) | 58.0 (9.0)           | 57.0 (10.0)  | 58.0 (10.0)     | 0.017 <sup>†</sup> |
|                    |                         | min-max      | 45-65                | 45-65        | 45-65           |                    |
|                    | missing                 | n            | 0                    | 0            | 0               | -                  |
| Gender             | male                    | n            | 500                  | 159          | 659             |                    |
|                    |                         | %            | 58.2                 | 66.5         | 60.0            | 0.020 <sup>◊</sup> |
|                    | female                  | n            | 359                  | 80           | 439             |                    |
|                    |                         | %            | 41.8                 | 33.5         | 40.0            |                    |
|                    | missing                 | n            | 0                    | 0            | 0               | -                  |
| Area1              | capital city            | n            | 345                  | 86           | 431             |                    |
|                    |                         | %            | 40.2                 | 36.0         | 39.3            |                    |
|                    | other metropolitan      | n            | 143                  | 39           | 182             |                    |
|                    |                         | %            | 16.7                 | 16.3         | 16.6            |                    |
|                    | large rural centre      | n            | 116                  | 37           | 153             |                    |
|                    |                         | %            | 13.5                 | 15.5         | 14.0            |                    |
|                    | small rural centre      | n            | 66                   | 15           | 81              |                    |
|                    |                         | %            | 7.7                  | 6.3          | 7.4             | 0.715 <sup>◊</sup> |
|                    | other rural centre      | n            | 144                  | 50           | 194             |                    |
|                    |                         | %            | 16.8                 | 20.9         | 17.7            |                    |
| remote centre      | n                       | 21           | 6                    | 27           |                 |                    |
|                    | %                       | 2.5          | 2.5                  | 2.5          |                 |                    |
| other remote area  | n                       | 23           | 6                    | 29           |                 |                    |
|                    | %                       | 2.7          | 2.5                  | 2.6          |                 |                    |
|                    | missing                 | n            | 1                    | 0            | 1               | -                  |
| Area2              | major city              | n            | 464                  | 117          | 581             |                    |
|                    |                         | %            | 54.1                 | 49.0         | 53.0            |                    |
|                    | inner regional          | n            | 186                  | 66           | 252             |                    |
|                    |                         | %            | 21.7                 | 27.6         | 23.0            |                    |
|                    | outer regional          | n            | 158                  | 44           | 202             |                    |
|                    |                         | %            | 18.4                 | 18.4         | 18.4            | 0.352 <sup>◊</sup> |
|                    | remote                  | n            | 28                   | 8            | 36              |                    |
|                    | %                       | 3.3          | 3.4                  | 3.3          |                 |                    |
| very remote        | n                       | 22           | 4                    | 26           |                 |                    |
|                    | %                       | 2.6          | 1.7                  | 2.4          |                 |                    |
|                    | missing                 | n            | 1                    | 0            | 1               | -                  |
| Excision or biopsy | excision                | n            | 444                  | 143          | 587             |                    |
|                    |                         | %            | 54.6                 | 60.1         | 55.8            | 0.130 <sup>◊</sup> |
|                    | biopsy                  | n            | 370                  | 95           | 465             |                    |
|                    |                         | %            | 45.5                 | 39.9         | 44.2            |                    |
|                    | missing                 | n            | 45                   | 1            | 46              | -                  |
| Cancer site        | colon                   | n            | 412                  | 105          | 517             |                    |
|                    |                         | %            | 48.6                 | 44.1         | 47.6            | 0.470 <sup>◊</sup> |
|                    | rectum                  | n            | 292                  | 90           | 382             |                    |
|                    | %                       | 34.4         | 37.8                 | 35.2         |                 |                    |

| Variables                           |                       |      | Participated in WACS |              |                 | p-value            |
|-------------------------------------|-----------------------|------|----------------------|--------------|-----------------|--------------------|
|                                     |                       |      | no<br>n=859          | yes<br>n=239 | total<br>n=1098 |                    |
|                                     | unknown               | n    | 144                  | 43           | 187             |                    |
|                                     |                       | %    | 17.0                 | 18.1         | 17.2            |                    |
|                                     | missing               | n    | 11                   | 1            | 12              | -                  |
| Histology                           | adenocarcinoma        | n    | 790                  | 225          | 1,015           | 0.728 <sup>◊</sup> |
|                                     |                       | %    | 93.9                 | 94.5         | 94.1            |                    |
|                                     | other                 | n    | 51                   | 13           | 64              |                    |
|                                     |                       | %    | 6.1                  | 5.5          | 5.9             |                    |
|                                     | missing               | n    | 18                   | 1            | 19              | -                  |
| Grade                               | well diff./low        | n    | 84                   | 19           | 103             | 0.325 <sup>◊</sup> |
|                                     |                       | %    | 12.7                 | 9.5          | 11.9            |                    |
|                                     | mod. diff./intermed.  | n    | 464                  | 151          | 615             |                    |
|                                     |                       | %    | 70.0                 | 75.1         | 71.2            |                    |
|                                     | poorly diff./high     | n    | 115                  | 31           | 146             |                    |
|                                     | %                     | 17.4 | 15.4                 | 16.9         |                 |                    |
|                                     | missing               | n    | 196                  | 38           | 234             | -                  |
| AJCC staging                        | 0                     | n    | 7                    | 0            | 7               | 0.091 <sup>◊</sup> |
|                                     |                       | %    | 1.8                  | 0.0          | 1.3             |                    |
|                                     | I                     | n    | 110                  | 46           | 156             |                    |
|                                     |                       | %    | 28.0                 | 33.8         | 29.5            |                    |
|                                     | IIA                   | n    | 93                   | 33           | 126             |                    |
|                                     |                       | %    | 23.7                 | 24.3         | 23.8            |                    |
|                                     | IIB                   | n    | 18                   | 7            | 25              |                    |
|                                     |                       | %    | 4.6                  | 5.2          | 4.7             |                    |
|                                     | IIIA                  | n    | 19                   | 5            | 24              |                    |
|                                     |                       | %    | 4.8                  | 3.7          | 4.5             |                    |
| IIIB                                | n                     | 72   | 21                   | 93           |                 |                    |
|                                     | %                     | 18.3 | 15.4                 | 17.6         |                 |                    |
| IIIC                                | n                     | 41   | 21                   | 62           |                 |                    |
|                                     | %                     | 10.4 | 15.4                 | 11.7         |                 |                    |
| IV                                  | n                     | 33   | 3                    | 36           |                 |                    |
|                                     | %                     | 8.4  | 2.2                  | 6.8          |                 |                    |
|                                     | missing               | n    | 466                  | 103          | 569             | -                  |
| Tumour size / invaded nearby tissue | no signs of tumour    | n    | 1                    | 0            | 1               | 0.463 <sup>Δ</sup> |
|                                     |                       | %    | 0.2                  | 0.0          | 0.2             |                    |
|                                     | size 1                | n    | 57                   | 24           | 81              |                    |
|                                     |                       | %    | 13.9                 | 17.7         | 14.8            |                    |
|                                     | size 2                | n    | 77                   | 28           | 105             |                    |
|                                     |                       | %    | 18.7                 | 20.6         | 19.2            |                    |
|                                     | size 3                | n    | 204                  | 67           | 271             |                    |
|                                     |                       | %    | 49.6                 | 49.3         | 49.5            |                    |
| size 4                              | n                     | 64   | 17                   | 81           |                 |                    |
|                                     | %                     | 15.6 | 12.5                 | 14.8         |                 |                    |
| carcinoma in situ                   | n                     | 8    | 0                    | 8            |                 |                    |
|                                     | %                     | 2.0  | 0.0                  | 1.5          |                 |                    |
|                                     | missing               | n    | 448                  | 103          | 551             | -                  |
| Regional lymph nodes                | tumor cells absent fr | n    | 209                  | 83           | 292             | 0.386 <sup>Δ</sup> |
|                                     |                       | %    | 54.3                 | 62.4         | 56.4            |                    |
|                                     | reg/lymph node metast | n    | 101                  | 28           | 129             |                    |
|                                     |                       | %    | 26.2                 | 21.1         | 24.9            |                    |
|                                     | spread to an extent b | n    | 73                   | 22           | 95              |                    |
|                                     |                       | %    | 19.0                 | 16.5         | 18.3            |                    |
| cannot be evaluated                 | n                     | 2    | 0                    | 2            |                 |                    |
|                                     | %                     | 0.5  | 0.0                  | 0.4          |                 |                    |
|                                     | missing               | n    | 474                  | 106          | 580             | -                  |

| Variables                                      |                            |   | Participated in WACS |              |                 | p-value            |   |
|------------------------------------------------|----------------------------|---|----------------------|--------------|-----------------|--------------------|---|
|                                                |                            |   | no<br>n=859          | yes<br>n=239 | total<br>n=1098 |                    |   |
| Spread of cancer from one body part to another | no distant metastasis      | n | 57                   | 28           | 85              | 0.045 <sup>◇</sup> |   |
|                                                | metastasis to distant      | n | 32                   | 4            | 36              |                    |   |
|                                                | cannot be evaluated        | n | 92                   | 37           | 129             |                    |   |
|                                                | missing                    | n | 678                  | 170          | 848             |                    | - |
|                                                | invasion into but not      | n | 37                   | 25           | 62              |                    |   |
| Dukes staging                                  | invasion through the lymph | n | 151                  | 51           | 202             | 0.005 <sup>◇</sup> |   |
|                                                | involvement of lymph       | n | 128                  | 46           | 174             |                    |   |
|                                                | widespread metastases      | n | 34                   | 3            | 37              |                    |   |
|                                                | missing                    | n | 509                  | 114          | 623             |                    | - |
|                                                | missing                    | n | 509                  | 114          | 623             |                    | - |

† t-test with equal variances used

◇ Pearson's chi-squared test used

Δ Fisher's exact test used

**Table 2. Descriptive analyses of baseline characteristics for completers versus non-completers (colorectal cancer group)**

| Variables        | Value labels, etc. | Phone interview, no. completed |              |              |                |       | Postal survey, no. completed |              |              |                |       |
|------------------|--------------------|--------------------------------|--------------|--------------|----------------|-------|------------------------------|--------------|--------------|----------------|-------|
|                  |                    | n                              | <two<br>n=57 | two<br>n=182 | total<br>n=239 | p     | n                            | <two<br>n=77 | two<br>n=162 | total<br>n=239 | p     |
| Age in 2010      | median (IQR) years | 239                            | 58 (9)       | 57 (9)       | 58 (9)         | 0.575 | 239                          | 58 (9)       | 56.5 (9)     | 57 (9)         | 0.957 |
|                  | range (years)      |                                | 45-64        | 45-65        | 45-65          |       |                              | 45-64        | 46-65        | 45-65          |       |
| Gender           | male               | 239                            | 43           | 117          | 160            | 0.118 | 239                          | 57           | 103          | 160            | 0.109 |
|                  | female             |                                | 75.4         | 64.3         | 67.0           |       |                              | 74.0         | 63.6         | 67.0           |       |
|                  | %                  |                                | 14           | 65           | 79             |       |                              | 20           | 59           | 79             |       |
| Country of birth | Australia          | 222                            | 34           | 146          | 180            | 0.895 | 222                          | 56           | 124          | 180            | 0.800 |
|                  | English speaking   |                                | 79.07        | 81.56        | 81.08          |       |                              | 82.4         | 80.5         | 81.1           |       |
|                  | other              |                                | 5            | 20           | 25             |       |                              | 8            | 17           | 25             |       |
|                  | %                  |                                | 11.63        | 11.17        | 11.26          |       |                              | 11.8         | 11.0         | 11.3           |       |
| First Peoples    | no                 | 222                            | 42           | 177          | 219            | 0.478 | 222                          | 67.0         | 152.0        | 219.0          | 1.000 |
|                  | yes                |                                | 97.67        | 98.88        | 98.65          |       |                              | 98.5         | 98.7         | 98.7           |       |
|                  | %                  |                                | 1            | 2            | 3              |       |                              | 1.0          | 2.0          | 3.0            |       |
| ARIA             | major city         | 239                            | 29           | 88           | 117            | 0.738 | 239                          | 34           | 83           | 117            | 0.026 |
|                  | inner regional     |                                | 50.9         | 48.4         | 49.0           |       |                              | 44.2         | 51.2         | 49.0           |       |
|                  | outer regional     |                                | 13           | 53           | 66             |       |                              | 16           | 50           | 66             |       |
|                  | remote             |                                | 22.8         | 29.1         | 27.6           |       |                              | 20.8         | 30.9         | 27.6           |       |
|                  | very remote        |                                | 13           | 31           | 44             |       |                              | 21           | 23           | 44             |       |
|                  | %                  |                                | 22.8         | 17.0         | 18.4           |       |                              | 27.3         | 14.2         | 18.4           |       |
| Area1            | capital city       | 239                            | 20           | 66           | 86             | 0.533 | 239                          | 28           | 58           | 86             | 0.266 |

| Variables          | Value labels, etc.   | Phone interview, no. completed |              |               |               | Postal survey, no. completed |          |              |               |               |          |
|--------------------|----------------------|--------------------------------|--------------|---------------|---------------|------------------------------|----------|--------------|---------------|---------------|----------|
|                    |                      |                                | <two         | two           | total         |                              | <two     | two          | total         |               |          |
|                    |                      | <i>n</i>                       | <i>n</i> =57 | <i>n</i> =182 | <i>n</i> =239 | <i>p</i>                     | <i>n</i> | <i>n</i> =77 | <i>n</i> =162 | <i>n</i> =239 | <i>p</i> |
|                    | %                    |                                | 35.1         | 36.3          | 36.0          |                              | 36.36    | 35.8         | 35.98         |               |          |
|                    | other metropolitan   |                                | 13           | 26            | 39            |                              | 11       | 28           | 39            |               |          |
|                    | %                    |                                | 22.8         | 14.3          | 16.3          |                              | 14.29    | 17.28        | 16.32         |               |          |
|                    | large rural centre   |                                | 9            | 28            | 37            |                              | 13       | 24           | 37            |               |          |
|                    | %                    |                                | 15.8         | 15.4          | 15.5          |                              | 16.88    | 14.81        | 15.48         |               |          |
|                    | small rural centre   |                                | 1            | 14            | 15            |                              | 4        | 11           | 15            |               |          |
|                    | %                    |                                | 1.8          | 7.7           | 6.3           |                              | 5.19     | 6.79         | 6.28          |               |          |
|                    | other rural centre   |                                | 11           | 39            | 50            |                              | 14       | 36           | 50            |               |          |
|                    | %                    |                                | 19.3         | 21.4          | 20.9          |                              | 18.18    | 22.22        | 20.92         |               |          |
|                    | remote centre        |                                | 2            | 4             | 6             |                              | 5        | 1            | 6             |               |          |
|                    | %                    |                                | 3.5          | 2.2           | 2.5           |                              | 6.49     | 0.62         | 2.51          |               |          |
|                    | other remote area    |                                | 1            | 5             | 6             |                              | 2        | 4            | 6             |               |          |
|                    | %                    |                                | 1.8          | 2.8           | 2.5           |                              | 2.6      | 2.47         | 2.51          |               |          |
| Marital status     | single               |                                | 6            | 16            | 22            |                              | 8        | 14           | 22            |               |          |
|                    | %                    |                                | 13.95        | 8.94          | 9.91          |                              | 11.76    | 9.09         | 9.91          |               |          |
|                    | widowed              |                                | 0            | 2             | 2             |                              | 1        | 1            | 2             |               |          |
|                    | %                    | 222                            | 0            | 1.12          | 0.9           | 0.506                        | 222      | 1.47         | 0.65          | 0.9           | 0.231    |
|                    | divorced/separated   |                                | 5            | 14            | 19            |                              | 9        | 10           | 19            |               |          |
|                    | %                    |                                | 11.63        | 7.82          | 8.56          |                              | 13.24    | 6.49         | 8.56          |               |          |
| married/partnered  |                      | 32                             | 147          | 179           |               | 50                           | 129      | 179          |               |               |          |
| %                  |                      | 74.42                          | 82.12        | 80.63         |               | 73.53                        | 83.77    | 80.63        |               |               |          |
| Education          | no formal schooling  |                                | 0            | 1             | 1             |                              | 0        | 1            | 1             |               |          |
|                    | %                    |                                | 0            | 0.56          | 0.45          |                              | 0        | 0.65         | 0.45          |               |          |
|                    | primary school       |                                | 3            | 14            | 17            |                              | 6        | 11           | 17            |               |          |
|                    | %                    |                                | 6.98         | 7.87          | 7.69          |                              | 8.96     | 7.14         | 7.69          |               |          |
|                    | junior high school   |                                | 16           | 74            | 90            |                              | 27       | 63           | 90            |               |          |
|                    | %                    | 221                            | 37.21        | 41.57         | 40.72         | 0.904                        | 221      | 40.3         | 40.91         | 40.72         | 0.853    |
|                    | senior high school   |                                | 7            | 29            | 36            |                              | 11       | 25           | 36            |               |          |
|                    | %                    |                                | 16.28        | 16.29         | 16.29         |                              | 16.42    | 16.23        | 16.29         |               |          |
| trade/TAFE/diploma |                      | 5                              | 24           | 29            |               | 11                           | 18       | 29           |               |               |          |
| %                  |                      | 11.63                          | 13.48        | 13.12         |               | 16.42                        | 11.69    | 13.12        |               |               |          |
| university         |                      | 12                             | 36           | 48            |               | 12                           | 36       | 48           |               |               |          |
| %                  |                      | 27.91                          | 20.22        | 21.72         |               | 17.91                        | 23.38    | 21.72        |               |               |          |
| Excision or biopsy | excision             |                                | 37           | 106           | 143           |                              | 44       | 99           | 143           |               |          |
|                    | %                    | 238                            | 64.9         | 58.6          | 60.1          | 0.393                        | 238      | 57.14        | 61.49         | 60.08         | 0.522    |
|                    | biopsy               |                                | 20           | 75            | 95            |                              | 33       | 62           | 95            |               |          |
| %                  |                      | 35.1                           | 41.4         | 39.9          |               | 42.86                        | 38.51    | 39.92        |               |               |          |
| Cancer site        | colon                |                                | 25           | 80            | 105           |                              | 36       | 69           | 105           |               |          |
|                    | %                    |                                | 43.9         | 44.2          | 44.1          |                              | 46.75    | 42.86        | 44.12         |               |          |
|                    | rectum               |                                | 24           | 66            | 90            |                              | 28       | 62           | 90            |               |          |
|                    | %                    | 238                            | 42.1         | 36.5          | 37.8          | 0.594                        | 238      | 36.36        | 38.51         | 37.82         | 0.847    |
| unknown            |                      | 8                              | 35           | 43            |               | 13                           | 30       | 43           |               |               |          |
| %                  |                      | 14.0                           | 19.3         | 18.1          |               | 16.88                        | 18.63    | 18.07        |               |               |          |
| Histology          | adenocarcinoma       |                                | 56           | 169           | 225           |                              | 74       | 151          | 225           |               |          |
|                    | %                    | 238                            | 98.3         | 93.4          | 94.5          | 0.199                        | 238      | 96.1         | 93.79         | 94.54         | 0.556    |
|                    | other                |                                | 1            | 12            | 13            |                              | 3        | 10           | 13            |               |          |
| %                  |                      | 1.8                            | 6.6          | 5.5           |               | 3.9                          | 6.21     | 5.46         |               |               |          |
| Grade              | well diff./low       |                                | 5            | 14            | 19            |                              | 4        | 15           | 19            |               |          |
|                    | %                    |                                | 10.4         | 9.2           | 9.5           |                              | 6.25     | 10.95        | 9.45          |               |          |
|                    | mod. diff./intermed. |                                | 39           | 112           | 151           |                              | 47       | 104          | 151           |               |          |
|                    | %                    | 201                            | 81.3         | 73.2          | 75.1          | 0.296                        | 201      | 73.44        | 75.91         | 75.12         | 0.285    |
| poorly diff./high  |                      | 4                              | 27           | 31            |               | 13                           | 18       | 31           |               |               |          |
| %                  |                      | 8.3                            | 17.7         | 15.4          |               | 20.31                        | 13.14    | 15.42        |               |               |          |
| AJCC staging       | 0                    | 136                            | -            | -             | -             | 0.575                        | 136      | -            | -             | -             | 0.087    |

| Variables                                      | Value labels, etc.    | Phone interview, no. completed |                |                |                |          | Postal survey, no. completed |                |                |                |          |
|------------------------------------------------|-----------------------|--------------------------------|----------------|----------------|----------------|----------|------------------------------|----------------|----------------|----------------|----------|
|                                                |                       |                                | <two           | two            | total          | <i>p</i> | <i>n</i>                     | <two           | two            | total          | <i>p</i> |
|                                                |                       | <i>n</i>                       | n=57           | n=182          | n=239          |          | <i>n</i>                     | n=77           | n=162          | n=239          |          |
|                                                | %                     |                                | -              | -              | -              |          | -                            | -              | -              |                |          |
|                                                | I                     |                                | 12             | 34             | 46             |          | 15                           | 31             | 46             |                |          |
|                                                | %                     |                                | 34.3           | 33.7           | 33.8           |          | 34.88                        | 33.33          | 33.82          |                |          |
|                                                | IIA                   |                                | 8              | 25             | 33             |          | 7                            | 26             | 33             |                |          |
|                                                | %                     |                                | 22.9           | 24.8           | 24.3           |          | 16.28                        | 27.96          | 24.26          |                |          |
|                                                | IIB                   |                                | 0              | 7              | 7              |          | 0                            | 7              | 7              |                |          |
|                                                | %                     |                                | 0.0            | 6.9            | 5.2            |          | 0                            | 7.53           | 5.15           |                |          |
|                                                | IIIA                  |                                | 2              | 3              | 5              |          | 3                            | 2              | 5              |                |          |
|                                                | %                     |                                | 5.7            | 3.0            | 3.7            |          | 6.98                         | 2.15           | 3.68           |                |          |
|                                                | IIIB                  |                                | 6              | 15             | 21             |          | 6                            | 15             | 21             |                |          |
|                                                | %                     |                                | 17.1           | 14.9           | 15.4           |          | 13.95                        | 16.13          | 15.44          |                |          |
|                                                | IIIC                  |                                | 7              | 14             | 21             |          | 11                           | 10             | 21             |                |          |
|                                                | %                     |                                | 20.0           | 13.9           | 15.4           |          | 25.58                        | 10.75          | 15.44          |                |          |
|                                                | IV                    |                                | 0              | 3              | 3              |          | 1                            | 2              | 3              |                |          |
|                                                | %                     |                                | 0.0            | 3.0            | 2.2            |          | 2.33                         | 2.15           | 2.21           |                |          |
| No. of people in household                     | median (IQR)<br>range | 222                            | 2 (1.0)<br>1-6 | 2 (1.0)<br>1-6 | 2 (1.0)<br>1-6 | 0.829    | 222                          | 2 (1.0)<br>1-6 | 2 (1.0)<br>1-6 | 2 (1.0)<br>1-6 | 0.829    |
| No. of <15yo in household                      | median (IQR)<br>range | 221                            | 0 (0.0)<br>0-2 | 0 (0.0)<br>0-3 | 0 (0.0)<br>0-3 | 0.419    | 221                          | 0 (0.0)<br>0-2 | 0 (0.0)<br>0-3 | 0 (0.0)<br>0-3 | 0.941    |
| Annual household income gross AUD2010-11       | less than \$ 10399    |                                | 0              | 2              | 2              |          |                              | 1              | 1              | 2              |          |
|                                                | %                     |                                | 0              | 1.14           | 0.93           |          |                              | 1.54           | 0.67           | 0.93           |          |
|                                                | \$ 10400 - \$ 36399   |                                | 3              | 11             | 14             |          |                              | 4              | 10             | 14             |          |
|                                                | %                     |                                | 7.5            | 6.29           | 6.51           |          |                              | 6.15           | 6.67           | 6.51           |          |
|                                                | \$ 36400 - \$ 77999   |                                | 7              | 47             | 54             |          |                              | 11             | 43             | 54             |          |
|                                                | %                     | 215                            | 17.5           | 26.86          | 25.12          | 0.102    | 215                          | 16.92          | 28.67          | 25.12          | 0.174    |
|                                                | \$ 78000 - \$103999   |                                | 6              | 41             | 47             |          |                              | 18             | 29             | 47             |          |
|                                                | %                     |                                | 15             | 23.43          | 21.86          |          |                              | 27.69          | 19.33          | 21.86          |          |
|                                                | \$104000 - above      |                                | 15             | 61             | 76             |          |                              | 21             | 55             | 76             |          |
| %                                              |                       | 37.5                           | 34.86          | 35.35          |                |          | 32.31                        | 36.67          | 35.35          |                |          |
|                                                | refused to answer     |                                | 9              | 13             | 22             |          |                              | 10             | 12             | 22             |          |
|                                                | %                     |                                | 22.5           | 7.43           | 10.23          |          |                              | 15.38          | 8              | 10.23          |          |
| Long-term health condition: arthritis          | no                    |                                | 38             | 144            | 182            |          |                              | 57             | 125            | 182            |          |
|                                                | %                     | 222                            | 88.37          | 80.45          | 81.98          | 0.225    | 222                          | 83.82          | 81.17          | 81.98          | 0.635    |
|                                                | yes                   |                                | 5              | 35             | 40             |          |                              | 11             | 29             | 40             |          |
|                                                | %                     |                                | 11.63          | 19.55          | 18.02          |          |                              | 16.18          | 18.83          | 18.02          |          |
| Long-term health condition: asthma             | no                    |                                | 39             | 163            | 202            |          |                              | 63             | 139            | 202            |          |
|                                                | %                     |                                | 90.7           | 91.06          | 90.99          | 1.000    |                              | 92.65          | 90.26          | 90.99          | 0.567    |
|                                                | yes                   |                                | 4              | 16             | 20             |          |                              | 5              | 15             | 20             |          |
|                                                | %                     |                                | 9.3            | 8.94           | 9.01           |          |                              | 7.35           | 9.74           | 9.01           |          |
| Long-term health condition: cancer             | no                    |                                | 37             | 156            | 193            |          |                              | 60             | 133            | 193            |          |
|                                                | %                     |                                | 86.05          | 87.15          | 86.94          | 0.847    |                              | 88.24          | 86.36          | 86.94          | 0.703    |
|                                                | yes                   |                                | 6              | 23             | 29             |          |                              | 8              | 21             | 29             |          |
|                                                | %                     |                                | 13.95          | 12.85          | 13.06          |          |                              | 11.76          | 13.64          | 13.06          |          |
| Long-term h/cond: chronic bronchitis/emphysema | no                    |                                | 40             | 170            | 210            |          |                              | 61             | 149            | 210            |          |
|                                                | %                     |                                | 95.24          | 94.97          | 95.02          | 1.000    |                              | 91.04          | 96.75          | 95.02          | 0.073    |
|                                                | yes                   |                                | 2              | 9              | 11             |          |                              | 6              | 5              | 11             |          |
|                                                | %                     |                                | 4.76           | 5.03           | 4.98           |          |                              | 8.96           | 3.25           | 4.98           |          |
| Long-term h/cond: diabetes (childhood onset)   | no                    |                                | 42             | 178            | 220            |          |                              | 66             | 154            | 220            |          |
|                                                | %                     |                                | 100            | 99.44          | 99.55          | 1.000    |                              | 98.51          | 100            | 99.55          | 0.129    |
|                                                | yes                   |                                | 0              | 1              | 1              |          |                              | 1              | 0              | 1              |          |
|                                                | %                     |                                | 0              | 0.56           | 0.45           |          |                              | 1.49           | 0              | 0.45           |          |
| Long-term health condition:                    | no                    |                                | 38             | 159            | 197            |          |                              | 57             | 140            | 197            |          |
|                                                | %                     |                                | 90.48          | 88.83          | 89.14          | 1.000    |                              | 85.07          | 90.91          | 89.14          | 0.200    |
|                                                | yes                   |                                | 4              | 20             | 24             |          |                              | 10             | 14             | 24             |          |

| Variables                                           | Value labels, etc.       | Phone interview, no. completed |       |       |       |          | Postal survey, no. completed |       |       |       |          |
|-----------------------------------------------------|--------------------------|--------------------------------|-------|-------|-------|----------|------------------------------|-------|-------|-------|----------|
|                                                     |                          |                                | <two  | two   | total | <i>p</i> |                              | <two  | two   | total | <i>p</i> |
|                                                     |                          | <i>n</i>                       | n=57  | n=182 | n=239 |          | <i>n</i>                     | n=77  | n=162 | n=239 |          |
| type2 diabetes (adult onset)                        | %                        |                                | 9.52  | 11.17 | 10.86 |          | 14.93                        | 9.09  | 10.86 |       |          |
| Long-term health condition: depression/anxiety      | no                       |                                | 38    | 163   | 201   | 1.000    | 58                           | 143   | 201   | 0.134 |          |
|                                                     | yes                      |                                | 4     | 16    | 20    |          | 9                            | 11    | 20    |       |          |
|                                                     | %                        |                                | 9.52  | 8.94  | 9.05  |          | 13.43                        | 7.14  | 9.05  |       |          |
| Long-term health condition: heart/ coronary disease | no                       |                                | 40    | 166   | 206   | 0.742    | 60                           | 146   | 206   | 0.154 |          |
|                                                     | yes                      |                                | 2     | 13    | 15    |          | 7                            | 8     | 15    |       |          |
|                                                     | %                        |                                | 4.76  | 7.26  | 6.79  |          | 10.45                        | 5.19  | 6.79  |       |          |
| Long-term health condition: high blood pressure     | no                       |                                | 32    | 133   | 165   | 0.800    | 44                           | 121   | 165   | 0.043 |          |
|                                                     | yes                      |                                | 10    | 46    | 56    |          | 23                           | 33    | 56    |       |          |
|                                                     | %                        |                                | 23.81 | 25.7  | 25.34 |          | 34.33                        | 21.43 | 25.34 |       |          |
| Long-term health condition: diverticulitis          | no                       |                                | 38    | 169   | 207   | 0.311    | 62                           | 145   | 207   | 0.650 |          |
|                                                     | yes                      |                                | 4     | 10    | 14    |          | 5                            | 9     | 14    |       |          |
|                                                     | %                        |                                | 9.52  | 5.59  | 6.33  |          | 7.46                         | 5.84  | 6.33  |       |          |
| Long-term health condition: inf. bowel disease      | no                       |                                | 40    | 175   | 215   | 0.320    | 63                           | 152   | 215   | 0.070 |          |
|                                                     | yes                      |                                | 2     | 4     | 6     |          | 4                            | 2     | 6     |       |          |
|                                                     | %                        |                                | 4.76  | 2.23  | 2.71  |          | 5.97                         | 1.3   | 2.71  |       |          |
| Long-term health condition: other circ. condition   | no                       |                                | 42    | 168   | 210   | 0.350    | 66                           | 144   | 210   | 0.441 |          |
|                                                     | yes                      |                                | 0     | 7     | 7     |          | 1                            | 6     | 7     |       |          |
|                                                     | %                        |                                | 0     | 4     | 3.23  |          | 1.49                         | 4     | 3.23  |       |          |
| Dukes stage                                         | invasion into bowel wall |                                | 7     | 18    | 25    | 0.418    | 7                            | 18    | 25    | 0.241 |          |
|                                                     |                          | %                              | 21.88 | 19.35 | 20    |          | 17.07                        | 21.43 | 20    |       |          |
|                                                     | invasion through wall    |                                | 10    | 41    | 51    |          | 13                           | 38    | 51    |       |          |
|                                                     |                          | %                              | 31.25 | 44.09 | 40.8  |          | 31.71                        | 45.24 | 40.8  |       |          |
|                                                     | inv. of lymph nodes      |                                | 15    | 31    | 46    |          | 20                           | 26    | 46    |       |          |
|                                                     | %                        | 46.88                          | 33.33 | 36.8  | 48.78 | 30.95    | 36.8                         |       |       |       |          |
|                                                     | widespread metastases    |                                | 0     | 3     | 3     | 1        | 2                            | 3     |       |       |          |
|                                                     | %                        |                                | 0     | 3.23  | 2.4   | 2.44     | 2.38                         | 2.4   |       |       |          |
| Received chemotherapy*                              | no                       |                                | 26    | 79    | 105   | 0.111    | 34                           | 71    | 105   | 0.612 |          |
|                                                     | yes                      |                                | 20    | 103   | 123   |          | 36                           | 87    | 123   |       |          |
|                                                     | %                        |                                | 43.48 | 56.59 | 53.95 |          | 51.43                        | 55.06 | 53.95 |       |          |
| Received radiotherapy*                              | no                       |                                | 40    | 149   | 189   | 0.146    | 61                           | 128   | 189   | 0.339 |          |
|                                                     | yes                      |                                | 4     | 33    | 37    |          | 9                            | 28    | 37    |       |          |
|                                                     | %                        |                                | 9.09  | 18.13 | 16.37 |          | 12.86                        | 17.95 | 16.37 |       |          |
| Laparoscopic surgery                                | no                       |                                | 12    | 73    | 85    | 0.128    | 28                           | 57    | 85    | 0.507 |          |
|                                                     | yes                      |                                | 29    | 100   | 129   |          | 37                           | 92    | 129   |       |          |
|                                                     | %                        |                                | 70.73 | 57.8  | 60.28 |          | 56.92                        | 61.74 | 60.28 |       |          |
| Were you fitted with a stoma?                       | no                       |                                | 27    | 123   | 150   | 0.905    | 43                           | 107   | 150   | 0.625 |          |
|                                                     |                          | %                              | 67.5  | 70.69 | 70.09 |          | 69.35                        | 70.39 | 70.09 |       |          |
|                                                     | yes, fitted with colo    |                                | 11    | 41    | 52    |          | 17                           | 35    | 52    |       |          |
|                                                     |                          | %                              | 27.5  | 23.56 | 24.3  |          | 27.42                        | 23.03 | 24.3  |       |          |
|                                                     | yes, fitted with ileo    |                                | 2     | 10    | 12    | 2        | 10                           | 12    |       |       |          |
|                                                     | %                        |                                | 5     | 5.75  | 5.61  | 3.23     | 6.58                         | 5.61  |       |       |          |
| Stoma temp. or perm. fitted                         | temporary stoma still    |                                | 5     | 25    | 30    | 0.765    | 8                            | 22    | 30    | 1.000 |          |
|                                                     | %                        |                                | 41.67 | 51.02 | 49.18 |          | 47.06                        | 50    | 49.18 |       |          |

| Variables | Value labels, etc.    | Phone interview, no. completed |              |              |                | Postal survey, no. completed |          |              |              |                |
|-----------|-----------------------|--------------------------------|--------------|--------------|----------------|------------------------------|----------|--------------|--------------|----------------|
|           |                       | <i>n</i>                       | <two<br>n=57 | two<br>n=182 | total<br>n=239 | <i>p</i>                     | <i>n</i> | <two<br>n=77 | two<br>n=162 | total<br>n=239 |
|           | temporary stoma no lo |                                | 4            | 14           | 18             |                              | 5        | 13           | 18           |                |
|           | %                     |                                | 33.33        | 28.57        | 29.51          |                              | 29.41    | 29.55        | 29.51        |                |
|           | permanent stoma       |                                | 3            | 10           | 13             |                              | 4        | 9            | 13           |                |
|           | %                     |                                | 25           | 20.41        | 21.31          |                              | 23.53    | 20.45        | 21.31        |                |

\* - over the 12 months study period
